# Supplementary material for: KOH-catalyzed highly efficient aminohalogenation of β-nitrostyrenes with t-butyl N,N-dichlorocarbamate as nitrogen/halogen source
Source: Royal Society of Chemistry journal article supplement (doi:10.1039/c1ra00174d), 2011-01-01

# Supporting Information

## KOH-catalyzed highly efficient aminohalogenation of $\beta$ -nitrostyrenes with *t*-butyl *N,N*-dichlorocarbamate as nitrogen/halogen source

Haibo Mei,<sup>a</sup> Jianlin Han,\*<sup>a</sup> Guigen Li<sup>a</sup> and Yi Pan\*<sup>a,b</sup>

<sup>a</sup> School of Chemistry and Chemical Engineering, Nanjing University, Nanjing, 210093, China. Fax: 86-25-83593153; Tel: 86-25-83593153; E-mail: hanjl@nju.edu.cn

<sup>b</sup> State of Key Laboratory of Coordination, Nanjing University, Nanjing, 210093, China. E-mail: yipan@nju.edu.cn

### Table of Contents

|                                                                                   | Page |
|-----------------------------------------------------------------------------------|------|
| 1. General information -----                                                      | 2    |
| 2. Aminohalogenation of $\beta$ -nitrostyrenes with BocNCl <sub>2</sub> -----     | 2    |
| 3. X-ray crystal structure of compound 3a -----                                   | 9    |
| 4. Aminohalogenation of $\beta$ -nitrostyrene with BocNH <sub>2</sub> and NCS --- | 10   |
| 5. <sup>1</sup> H and <sup>13</sup> C NMR spectra for compound 3 -----            | 11   |

## 1. General information

All aminohalogenation reactions were performed in oven-dried vials under N<sub>2</sub> atmosphere. Solvent acetonitrile was dried and distilled prior to use. BocNCl<sub>2</sub><sup>1</sup> and all the β-nitrostyrenes<sup>2</sup> were prepared according to the reported methods. The other chemicals were used as obtained from commercial sources without further purification. Flash chromatography was performed using silica gel 60 (200-300 mesh). Thin layer chromatography was carried out on silica gel 60 F-254 TLC plates of 20 cm × 20 cm. Melting points are uncorrected. IR spectra were collected on Bruker Vector 22 in KBr pellets. <sup>1</sup>H and <sup>13</sup>C NMR (TMS used as internal standard) spectra were recorded with a Bruker ARX 300 spectrometer. High resolution mass spectra for all the new compounds were done by Micromass Q-ToF instrument (ESI).

## 2. Aminohalogenation of β-nitrostyrenes with BocNCl<sub>2</sub>

Into an oven-dried reaction vial flushed with N<sub>2</sub> were taken β-nitrostyrenes (0.5 mmol), KOH (0.1 mmol), anhydrous MeCN (5.0 mL) and BocNCl<sub>2</sub> (1.25 mmol). The reaction mixture was stirred at room temperature for desired time, and then the reaction was quenched with saturated Na<sub>2</sub>SO<sub>3</sub> (3.0 mL). The organic layer was taken and the aqueous layer was extracted with EtOAc (2 × 20 mL). The combined organic layers were dried with anhydrous Na<sub>2</sub>SO<sub>4</sub>, filtered and the solvent was removed to give the crude product, which was purified by TLC plate (hexane/EtOAc, 8:1).

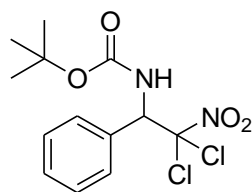

*Tert*-butyl 2,2-dichloro-2-nitro-1-phenylethylcarbamate (**3a**):

white solid, yield 93%, mp 105-107 °C. <sup>1</sup>H NMR (CDCl<sub>3</sub>, 300 MHz): δ = 7.42 (s, 5 H), 5.99 (d, *J* = 9.6 Hz, 1 H), 5.57 (d, *J* = 9.9 Hz, 1 H), 1.45 (s, 9 H). <sup>13</sup>C NMR (CDCl<sub>3</sub>, 75 MHz): δ = 154.0, 133.1, 129.7, 128.9, 128.7, 116.0, 81.4, 63.8, 28.2. IR

(KBr):  $\nu = 3415, 2971, 1705, 1572, 1510, 1241, 709 \text{ cm}^{-1}$ . HRMS  $[M+Na^+]$ : calcd for  $C_{13}H_{16}N_2O_4Cl_2Na$ : 357.0379, found: 357.0387.

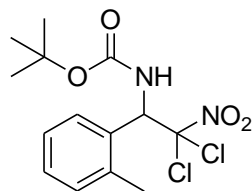

*Tert*-butyl 2,2-dichloro-2-nitro-1-o-tolyethylcarbamate (**3b**):

white solid, yield 77%, mp 154-156 °C.  $^1H$  NMR ( $CDCl_3$ , 300 MHz):  $\delta = 7.49$  (d,  $J = 6.9$  Hz, 1 H), 7.26-7.36 (m, 3 H), 6.39 (d,  $J = 9.9$  Hz, 1 H), 5.49 (d,  $J = 9.9$  Hz, 1 H), 2.61 (s, 3 H), 1.43 (s, 9 H).  $^{13}C$  NMR ( $CDCl_3$ , 75 MHz):  $\delta = 154.0, 138.1, 133.0, 131.1, 129.4, 126.5, 125.4, 116.4, 81.4, 58.6, 28.1, 20.3$ . IR (KBr):  $\nu = 3260, 2987, 1709, 1585, 1367, 1155, 1019, 740 \text{ cm}^{-1}$ . HRMS  $[M+Na^+]$ : calcd for  $C_{14}H_{18}N_2O_4Cl_2Na$ : 371.0536, found: 371.0531.

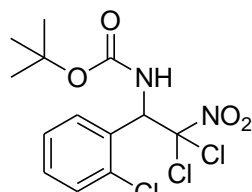

*Tert*-butyl 2,2-dichloro-1-(2-chlorophenyl)-2-nitroethylcarbamate

(**3c**): white solid, yield 75%, mp 167-169 °C.  $^1H$  NMR ( $CDCl_3$ , 300 MHz):  $\delta = 7.48$ -7.51 (m, 2 H), 7.33-7.40 (m, 2 H), 6.75 (d,  $J = 10.2$  Hz, 1 H), 5.56 (s, 1 H), 1.44 (s, 9 H).  $^{13}C$  NMR ( $CDCl_3$ , 75 MHz):  $\delta = 153.6, 135.6, 132.3, 130.7, 130.2, 128.6, 127.3, 115.6, 81.6, 59.2, 28.1$ . IR (KBr):  $\nu = 3258, 3148, 2992, 1708, 1585, 1367, 1155, 749 \text{ cm}^{-1}$ . HRMS  $[M+Na^+]$ : calcd for  $C_{13}H_{15}N_2O_4Cl_3Na$ : 390.9990, found: 390.9992.

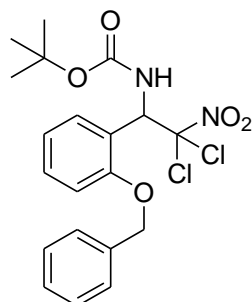

*Tert*-butyl

1-(2-(benzyloxy)phenyl)-2,2-dichloro-2-nitroethylcarbamate (**3d**): white solid, yield 76%, mp 113-114 °C.  $^1\text{H}$  NMR ( $\text{CDCl}_3$ , 300 MHz):  $\delta$  = 7.35-7.51 (m, 7 H), 7.04 (t,  $J$  = 4.2 Hz, 2 H), 6.36 (d,  $J$  = 10.2 Hz, 1 H), 6.19 (d,  $J$  = 10.5 Hz, 1 H), 5.17 (s, 2 H), 1.44 (s, 9 H).  $^{13}\text{C}$  NMR ( $\text{CDCl}_3$ , 75 MHz):  $\delta$  = 156.9, 154.3, 136.2, 131.9, 130.9, 129.8, 128.8, 128.2, 127.4, 121.1, 116.6, 112.8, 80.9, 70.6, 61.1, 28.2. IR (KBr):  $\nu$  = 3255, 2979, 1711, 1584, 1368, 1254, 749  $\text{cm}^{-1}$ . HRMS [ $\text{M}+\text{Na}^+$ ]: calcd for  $\text{C}_{20}\text{H}_{22}\text{N}_2\text{O}_5\text{Cl}_2\text{Na}$ : 463.0798, found: 463.0801.

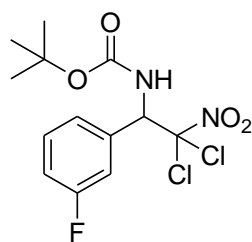

*Tert*-butyl 2,2-dichloro-1-(3-fluorophenyl)-2-nitroethylcarbamate (**3e**): white solid, yield 93%, mp 116-117 °C.  $^1\text{H}$  NMR ( $\text{CDCl}_3$ , 300 MHz):  $\delta$  = 7.36-7.43 (m, 1 H), 7.10-7.24 (m, 3 H), 5.99 (d,  $J$  = 9.9 Hz, 1 H), 5.55 (s, 1 H), 1.45 (s, 9 H).  $^{13}\text{C}$  NMR ( $\text{CDCl}_3$ , 75 MHz):  $\delta$  = 164.2, 160.9, 153.9, 135.5 (d,  $J$  = 6.3 Hz), 130.3 (d,  $J$  = 7.9 Hz), 124.8 (d,  $J$  = 2.8 Hz), 116.9 (d,  $J$  = 20.7 Hz), 116.1 (d,  $J$  = 22.7 Hz), 81.7, 63.3, 28.1. IR (KBr):  $\nu$  = 3255, 3146, 2987, 1698, 1585, 1368, 1158, 724  $\text{cm}^{-1}$ . HRMS [ $\text{M}+\text{Na}^+$ ]: calcd for  $\text{C}_{13}\text{H}_{15}\text{N}_2\text{O}_4\text{Cl}_2\text{FNa}$ : 375.0285, found: 375.0292.

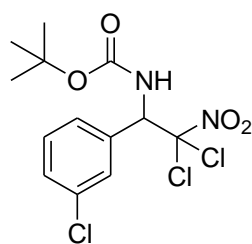

*Tert*-butyl 2,2-dichloro-1-(3-chlorophenyl)-2-nitroethylcarbamate (**3f**): white solid, yield 92%, mp 136-137 °C.  $^1\text{H}$  NMR ( $\text{CDCl}_3$ , 300 MHz):  $\delta$  = 7.38-7.44 (m, 2 H), 7.35 (d,  $J$  = 6.3 Hz, 2 H), 5.98 (d,  $J$  = 9.9 Hz, 1 H), 5.57 (s, 1H), 1.45 (s, 9 H).  $^{13}\text{C}$  NMR ( $\text{CDCl}_3$ , 75 MHz):  $\delta$  = 153.9, 135.1, 134.6, 130.9, 129.9, 129.0, 127.3, 115.4, 81.7, 63.2, 28.1. IR (KBr):  $\nu$  = 3252, 3149, 2985, 1703, 1588, 1370, 1158, 722  $\text{cm}^{-1}$ . HRMS [ $\text{M}+\text{Na}^+$ ]: calcd for  $\text{C}_{13}\text{H}_{15}\text{N}_2\text{O}_4\text{Cl}_3\text{Na}$ : 390.9990, found: 390.9989.

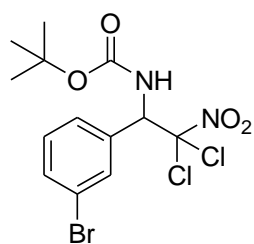

*Tert*-butyl 1-(3-bromophenyl)-2,2-dichloro-2-nitroethylcarbamate (**3g**): white solid, yield 90%, mp 153-154 °C. <sup>1</sup>H NMR (CDCl<sub>3</sub>, 300 MHz): δ = 7.54-7.60 (m, 2 H), 7.39 (d, *J* = 7.5 Hz, 1 H), 7.31 (d, *J* = 7.8 Hz, 1 H), 5.97 (d, *J* = 9.9 Hz, 1 H), 5.59 (d, *J* = 9.6 Hz, 1 H), 1.45 (s, 9 H). <sup>13</sup>C NMR (CDCl<sub>3</sub>, 75 MHz): δ = 153.8, 135.4, 132.8, 131.8, 130.2, 127.7, 122.7, 115.4, 81.8, 63.2, 28.1. IR (KBr): ν = 3250, 3149, 2983, 1702, 1586, 1369, 1158 cm<sup>-1</sup>. HRMS [M+Na<sup>+</sup>]: calcd for C<sub>13</sub>H<sub>15</sub>N<sub>2</sub>O<sub>4</sub>Cl<sub>2</sub>BrNa: 436.9461, found: 436.9470.

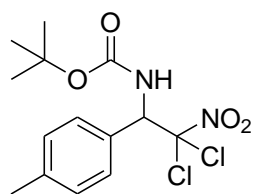

*Tert*-butyl 2,2-dichloro-2-nitro-1-p-tolyloethylcarbamate (**3h**): white solid, yield 99%, mp 108-109 °C. <sup>1</sup>H NMR (CDCl<sub>3</sub>, 300 MHz): δ = 7.32 (d, *J* = 8.1 Hz, 2 H), 7.23 (d, *J* = 8.1 Hz, 2 H), 5.94 (d, *J* = 9.9 Hz, 1 H), 5.54 (d, *J* = 10.2 Hz, 1 H), 2.38 (s, 3 H), 1.45 (s, 9 H). <sup>13</sup>C NMR (CDCl<sub>3</sub>, 75 MHz): δ = 154.1, 139.7, 130.1, 129.4, 128.7, 116.2, 81.4, 63.6, 28.2, 21.2. IR (KBr): ν = 3260, 3153, 2981, 1707, 1586, 1367, 1155, 775 cm<sup>-1</sup>. HRMS [M+Na<sup>+</sup>]: calcd for C<sub>14</sub>H<sub>18</sub>N<sub>2</sub>O<sub>4</sub>Cl<sub>2</sub>Na: 371.0536, found: 371.0525.

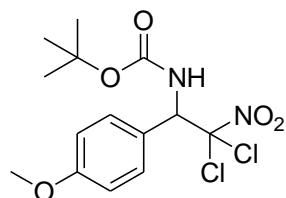

*Tert*-butyl 2,2-dichloro-1-(4-methoxyphenyl)-2-nitroethylcarbamate (**3i**): white solid, yield 96%, mp 114-115 °C. <sup>1</sup>H NMR (CDCl<sub>3</sub>, 300 MHz): δ = 7.35 (d, *J* = 8.7 Hz, 2 H), 6.93 (d, *J* = 8.7 Hz, 2 H), 5.93 (d, *J* = 9.6 Hz, 1 H), 5.51 (d, *J* = 9.9 Hz, 1 H), 3.83 (s, 3 H), 1.45

(s, 9 H).  $^{13}\text{C}$  NMR ( $\text{CDCl}_3$ , 75 MHz):  $\delta = 160.5, 154.0, 130.1, 125.0, 116.2, 114.0, 81.4, 63.4, 55.3, 28.2$ . IR (KBr):  $\nu = 3310, 2976, 1694, 1510, 1243, 1170, 841\text{ cm}^{-1}$ . HRMS  $[\text{M}+\text{Na}^+]$ : calcd for  $\text{C}_{14}\text{H}_{18}\text{N}_2\text{O}_5\text{Cl}_2\text{Na}$ : 387.0485, found: 387.0474.

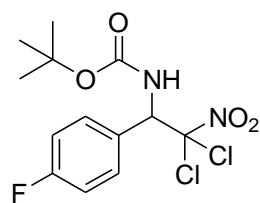

*Tert*-butyl 2,2-dichloro-1-(4-fluorophenyl)-2-nitroethylcarbamate

(**3j**): white solid, yield 93%, mp 109-110 °C.  $^1\text{H}$  NMR ( $\text{CDCl}_3$ , 300 MHz):  $\delta = 7.40\text{-}7.45$  (m, 2 H), 7.06-7.14 (m, 2 H), 5.98 (d,  $J = 9.6$  Hz, 1 H), 5.56 (d,  $J = 8.4$  Hz, 1 H), 1.44 (s, 9 H).  $^{13}\text{C}$  NMR ( $\text{CDCl}_3$ , 75 MHz):  $\delta = 165.0$  (d,  $J = 248.0$  Hz), 153.9, 131.8, 130.8 (d,  $J = 8.5$  Hz), 129.1, 115.9 (d,  $J = 21.4$  Hz), 81.6, 63.1, 28.1. IR (KBr):  $\nu = 3289, 2977, 1687, 1587, 1510, 1164, 839\text{ cm}^{-1}$ . HRMS  $[\text{M}+\text{Na}^+]$ : calcd for  $\text{C}_{13}\text{H}_{15}\text{N}_2\text{O}_4\text{Cl}_2\text{FNa}$ : 375.0285, found: 375.0290.

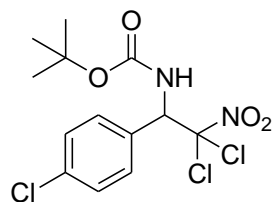

*Tert*-butyl

2,2-dichloro-1-(4-chlorophenyl)-2-nitroethylcarbamate (**3k**): white solid, yield 95%, mp 101-103 °C.  $^1\text{H}$  NMR ( $\text{CDCl}_3$ , 300 MHz):  $\delta = 7.38$  (s, 4 H), 5.97 (d,  $J = 9.9$  Hz, 1 H), 5.56 (s, 1 H), 1.44 (s, 9 H).  $^{13}\text{C}$  NMR ( $\text{CDCl}_3$ , 75 MHz):  $\delta = 153.9, 135.9, 131.7, 130.2, 128.9, 115.5, 81.7, 63.2, 28.1$ . IR (KBr):  $\nu = 3258, 3153, 2982, 1705, 1586, 1368, 1155, 751\text{ cm}^{-1}$ . HRMS  $[\text{M}+\text{Na}^+]$ : calcd for  $\text{C}_{13}\text{H}_{15}\text{N}_2\text{O}_4\text{Cl}_3\text{Na}$ : 390.9990, found: 390.9998.

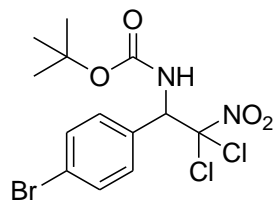

*Tert*-butyl

1-(4-bromophenyl)-2,2-dichloro-2-nitroethylcarbamate (**3l**): white solid, yield 94%, mp 106-107 °C. <sup>1</sup>H NMR (CDCl<sub>3</sub>, 300 MHz): δ = 7.56 (d, *J* = 8.4 Hz, 2 H), 7.33 (d, *J* = 8.4 Hz, 2 H), 5.96 (d, *J* = 9.6 Hz, 1 H), 5.56 (d, *J* = 8.1 Hz, 1 H), 1.44 (s, 9 H). <sup>13</sup>C NMR (CDCl<sub>3</sub>, 75 MHz): δ = 153.8, 132.2, 131.9, 130.5, 124.1, 115.4, 81.7, 63.2, 28.1. IR (KBr): ν = 3263, 3159, 2987, 1703, 1588, 1368, 1158, 1013 cm<sup>-1</sup>. HRMS [M+Na<sup>+</sup>]: calcd for C<sub>13</sub>H<sub>15</sub>N<sub>2</sub>O<sub>4</sub>Cl<sub>2</sub>BrNa: 436.9461, found: 436.9465.

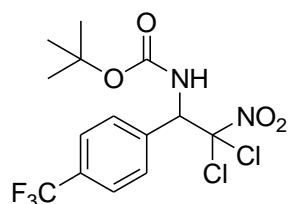

*Tert*-butyl

2,2-dichloro-2-nitro-1-(4-(trifluoromethyl)phenyl)ethylcarbamate (**3m**): white solid, yield 91%, mp 117-118 °C. <sup>1</sup>H NMR (CDCl<sub>3</sub>, 300 MHz): δ = 7.70 (d, *J* = 7.5 Hz, 2 H), 7.59 (d, *J* = 7.8 Hz, 2 H), 6.05 (d, *J* = 6.9 Hz, 1 H), 5.57 (d, *J* = 8.1 Hz, 1 H), 1.45 (s, 9 H). <sup>13</sup>C NMR (CDCl<sub>3</sub>, 75 MHz): δ = 153.9, 137.1, 132.1 (d, *J* = 32.9 Hz), 129.4, 125.7 (d, *J* = 3.2 Hz), 121.8, 115.1, 81.9, 63.3, 28.1. IR (KBr): ν = 3327, 2982, 1686, 1589, 1327, 1166, 1071 cm<sup>-1</sup>. HRMS [M+Na<sup>+</sup>]: calcd for C<sub>14</sub>H<sub>15</sub>N<sub>2</sub>O<sub>4</sub>Cl<sub>2</sub>F<sub>3</sub>Na: 425.0253, found: 425.0249.

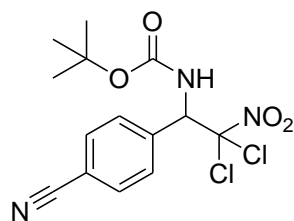

*Tert*-butyl

2,2-dichloro-1-(4-cyanophenyl)-2-nitroethylcarbamate (**3n**): white solid, yield 74%, mp 129-130 °C. <sup>1</sup>H NMR (CDCl<sub>3</sub>, 300 MHz): δ = 7.74 (d, *J* = 8.4 Hz, 2 H), 7.60 (d, *J*

= 8.1 Hz, 2 H), 6.05 (d,  $J = 10.2$  Hz, 1 H), 5.58 (d,  $J = 9.3$  Hz, 1 H), 1.44 (s, 9 H).  $^{13}\text{C}$  NMR ( $\text{CDCl}_3$ , 75 MHz):  $\delta = 153.8, 138.3, 132.3, 129.9, 118.0, 114.9, 113.7, 82.0, 63.3, 28.1$ . IR (KBr):  $\nu = 3368, 3328, 2974, 2235, 1707, 1592, 1504, 1246, 1167, 838$   $\text{cm}^{-1}$ . HRMS [ $\text{M}+\text{Na}^+$ ]: calcd for  $\text{C}_{14}\text{H}_{15}\text{N}_3\text{O}_4\text{Cl}_2\text{Na}$ : 382.0332, found: 382.0330.

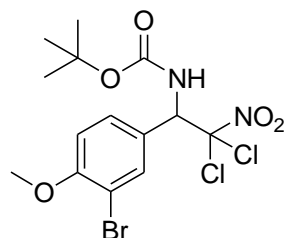

*Tert*-butyl

1-(3-bromo-4-methoxyphenyl)-2,2-dichloro-2-nitroethylcarbamate (**3o**): white solid, yield 79%, mp 169-171 °C.  $^1\text{H}$  NMR ( $\text{CDCl}_3$ , 300 MHz):  $\delta = 7.62$  (d,  $J = 2.4$  Hz, 1 H), 7.35 (dd,  $J = 2.4, 8.4$  Hz, 1 H), 6.92 (d,  $J = 8.4$  Hz, 1 H), 5.91 (d,  $J = 9.3$  Hz, 1 H), 5.50 (d,  $J = 9.3$  Hz, 1 H), 3.93 (s, 3 H), 1.45 (s, 9 H).  $^{13}\text{C}$  NMR ( $\text{CDCl}_3$ , 75 MHz):  $\delta = 156.9, 153.9, 133.4, 129.5, 126.5, 115.7, 111.9, 111.6, 81.7, 62.8, 56.3, 28.1$ . IR (KBr):  $\nu = 3271, 2984, 1698, 1585, 1367, 1163, 1020, 901, 775$   $\text{cm}^{-1}$ . HRMS [ $\text{M}+\text{Na}^+$ ]: calcd for  $\text{C}_{14}\text{H}_{17}\text{N}_2\text{O}_5\text{Cl}_2\text{BrNa}$ : 466.9567, found: 466.9562.

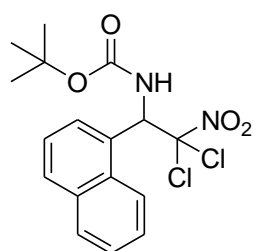

*Tert*-butyl 2,2-dichloro-1-(naphthalen-1-yl)-2-nitroethylcarbamate

(**3p**): white solid, yield 56%, mp 197-199 °C.  $^1\text{H}$  NMR ( $\text{CDCl}_3$ , 300 MHz):  $\delta = 8.41$  (d,  $J = 7.8$  Hz, 1 H), 7.91-7.97 (m, 2 H), 7.64-7.73 (m, 2 H), 7.52-7.60 (m, 2 H), 7.06 (d,  $J = 9.9$  Hz, 1 H), 5.69 (d,  $J = 9.0$  Hz, 1 H), 1.42 (s, 9 H).  $^{13}\text{C}$  NMR ( $\text{CDCl}_3$ , 75 MHz):  $\delta = 154.1, 133.7, 132.0, 130.7, 130.4, 129.0, 127.3, 126.3, 125.3, 125.0, 123.3, 116.4, 81.5, 57.5, 28.1$ . IR (KBr):  $\nu = 3242, 3137, 2974, 1694, 1585, 1364, 1156, 776$   $\text{cm}^{-1}$ . HRMS [ $\text{M}+\text{Na}^+$ ]: calcd for  $\text{C}_{17}\text{H}_{18}\text{N}_2\text{O}_4\text{Cl}_2\text{Na}$ : 407.0536, found: 407.0525.



### 3. X-ray crystal structure of compound 3a

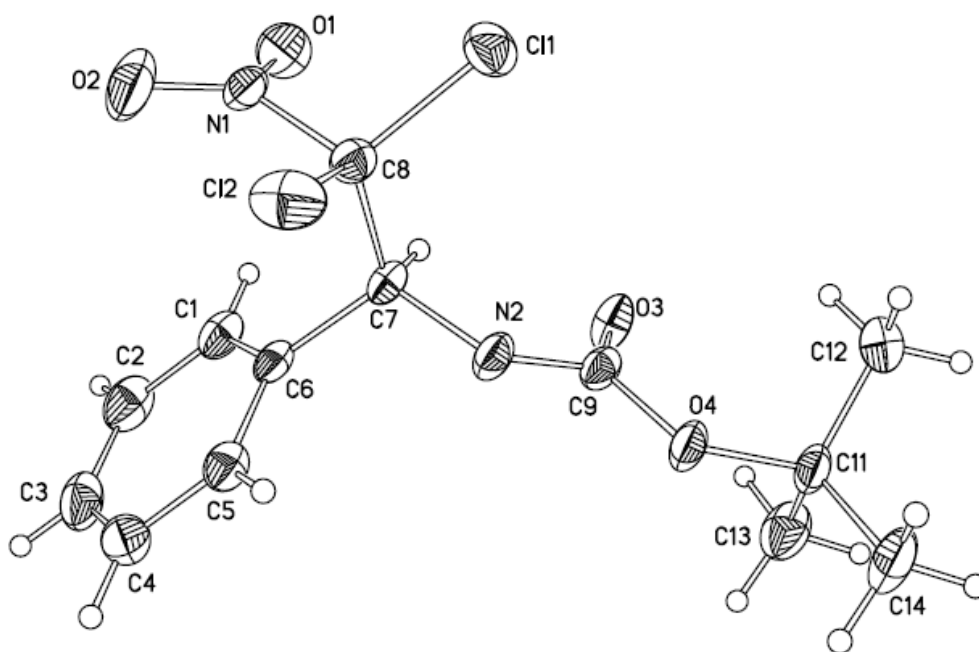

**Figure 1** X-ray crystal structure of compound **3a** (CCDC number 820793)

#### 4. Aminohalogenation of $\beta$ -nitrostyrene with BocNH<sub>2</sub> and NCS

Into an oven-dried reaction vial flushed with N<sub>2</sub> were taken  $\beta$ -nitrostyrenes (0.5 mmol), K<sub>2</sub>CO<sub>3</sub> (0.1 mmol), BocNCl<sub>2</sub> (1.5 mmol), NCS (1.5 mmol) and anhydrous MeCN (5.0 mL). The reaction mixture was stirred at room temperature for 12 h, and then the reaction was quenched with saturated Na<sub>2</sub>SO<sub>3</sub> (3.0 mL). The organic layer was taken and the aqueous layer was extracted with EtOAc (2 × 20 mL). The combined organic layers were dried with anhydrous Na<sub>2</sub>SO<sub>4</sub>, filtered and the solvent was removed to give the crude product, which was purified by TLC plate (hexane/EtOAc, 8:1).

#### Reference

- [1] White, R. E.; Kovacic, P.; *J. Am. Chem. Soc.* **1975**, 1180.
- [2] Bowman, R. K.; Johnson, J. S. *J. Org. Chem.* **2004**, 69, 8537.

## 5. $^1\text{H}$ and $^{13}\text{C}$ NMR spectra for compound 3

$^1\text{H}$  NMR of **3a** ( $\text{CDCl}_3$ , 300 MHz)

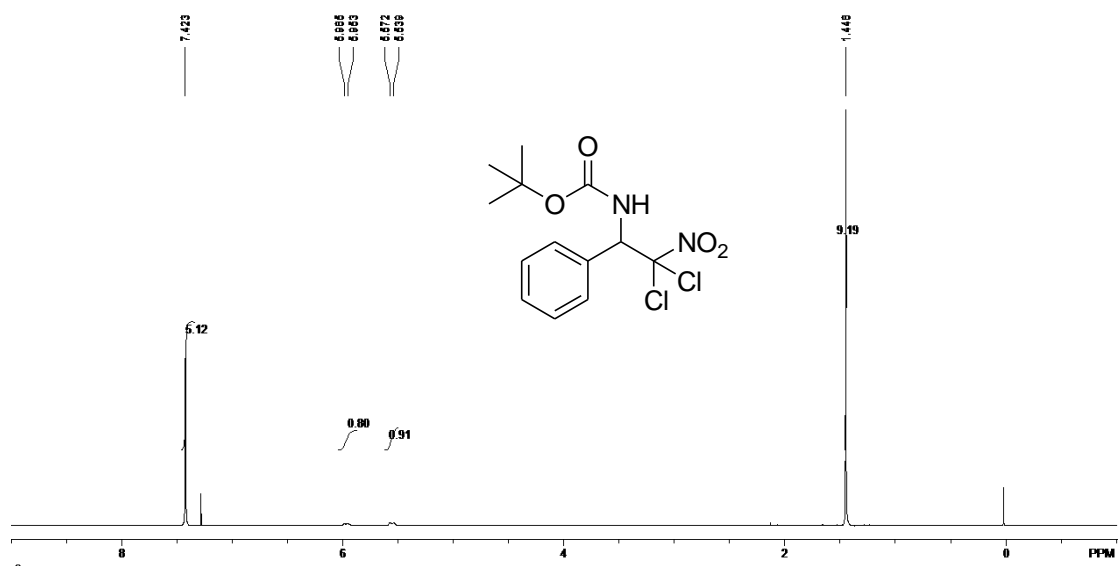

$^{13}\text{C}$  NMR of **3a** ( $\text{CDCl}_3$ , 75 MHz)

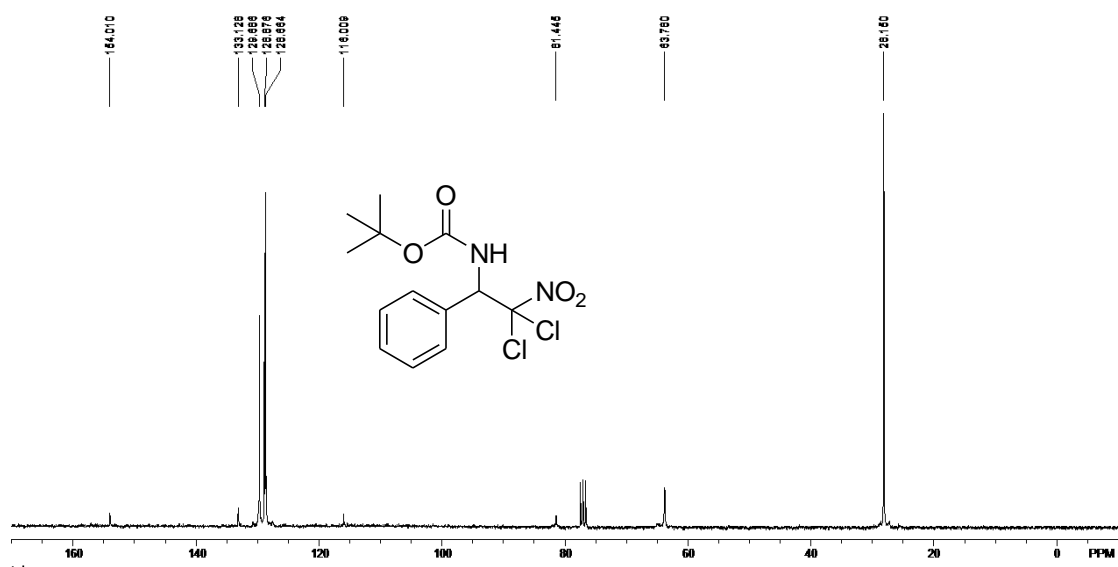

$^1\text{H}$  NMR of **3b** ( $\text{CDCl}_3$ , 300 MHz)

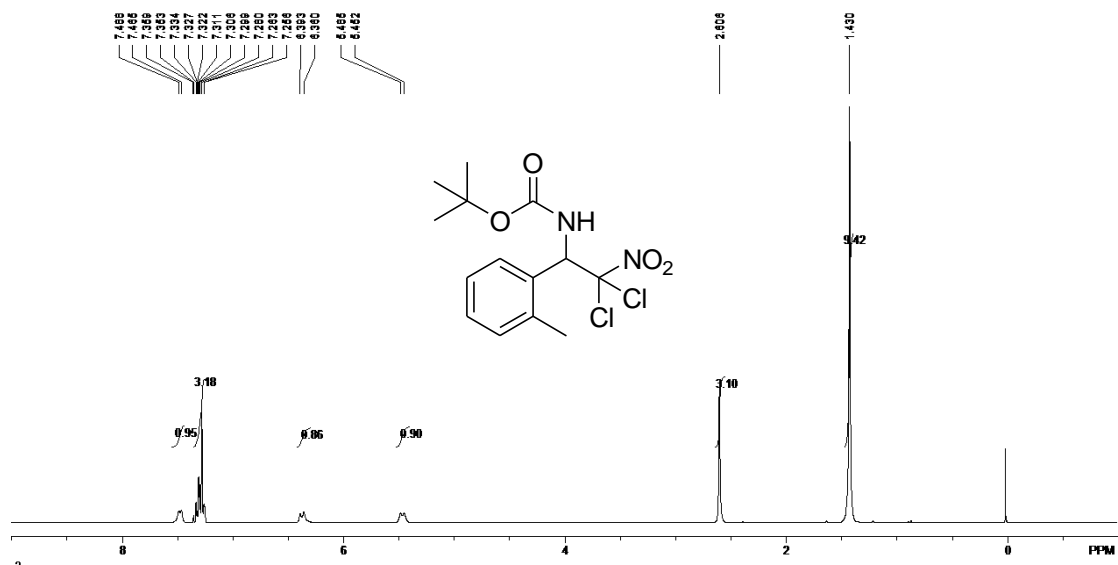

$^{13}\text{C}$  NMR of **3b** ( $\text{CDCl}_3$ , 75 MHz)

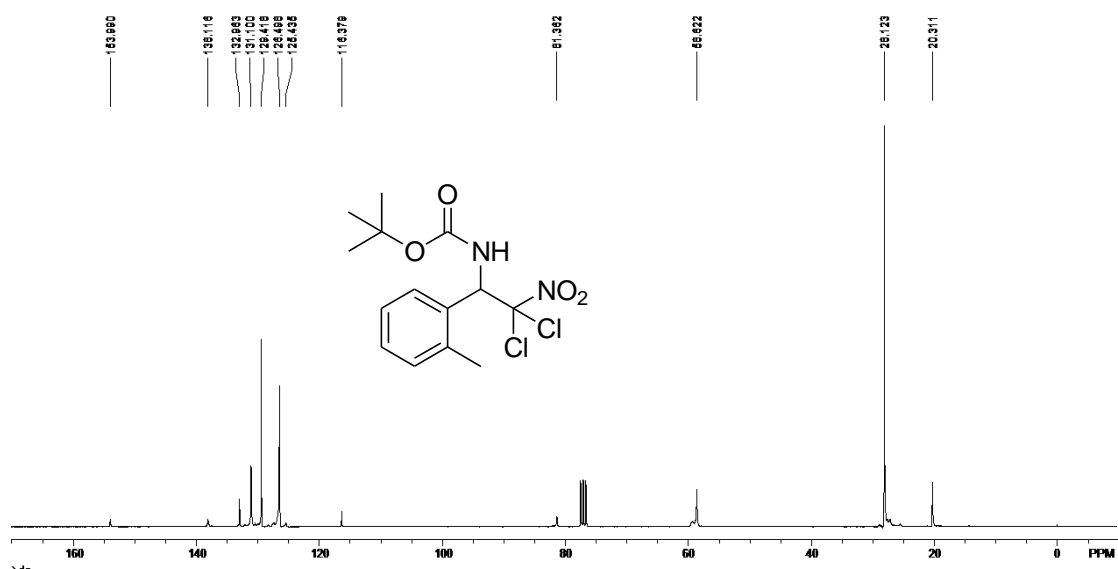

$^1\text{H}$  NMR of **3c** ( $\text{CDCl}_3$ , 300 MHz)

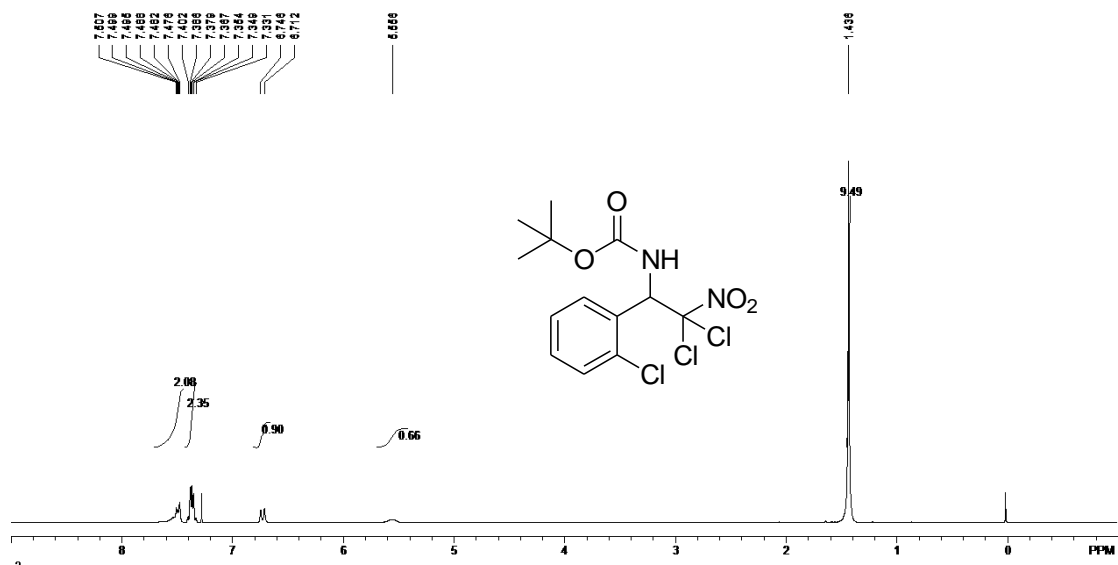

$^{13}\text{C}$  NMR of **3c** ( $\text{CDCl}_3$ , 75 MHz)

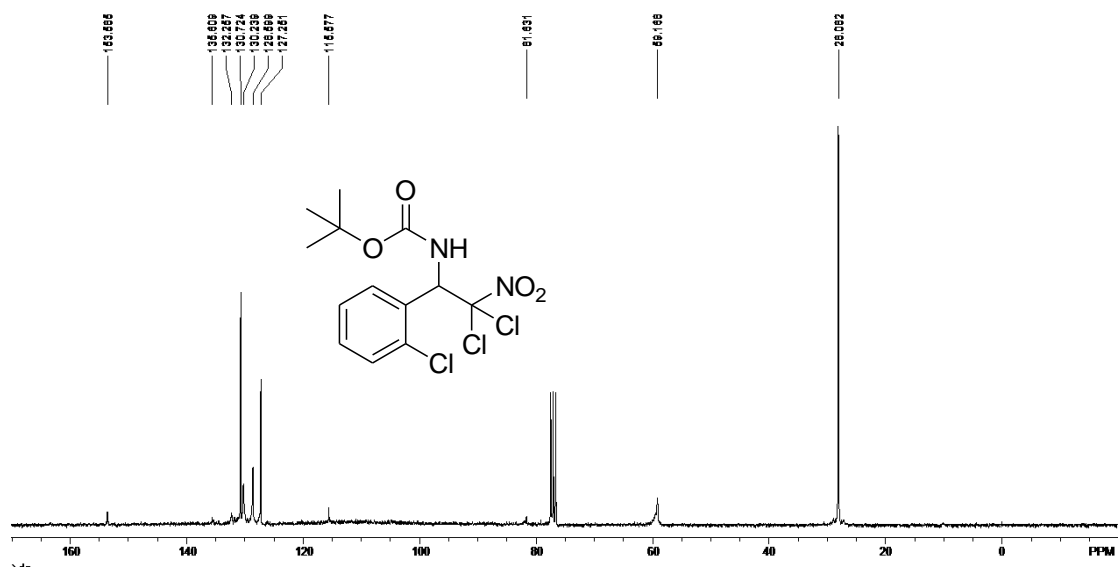

$^1\text{H}$  NMR of **3d** ( $\text{CDCl}_3$ , 300 MHz)

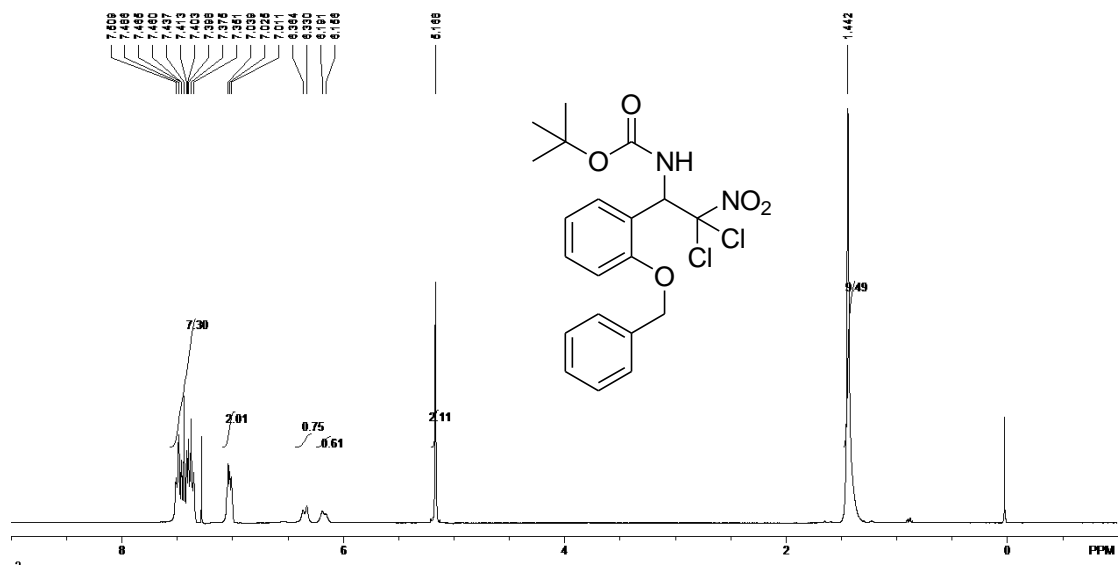

$^{13}\text{C}$  NMR of **3d** ( $\text{CDCl}_3$ , 75 MHz)

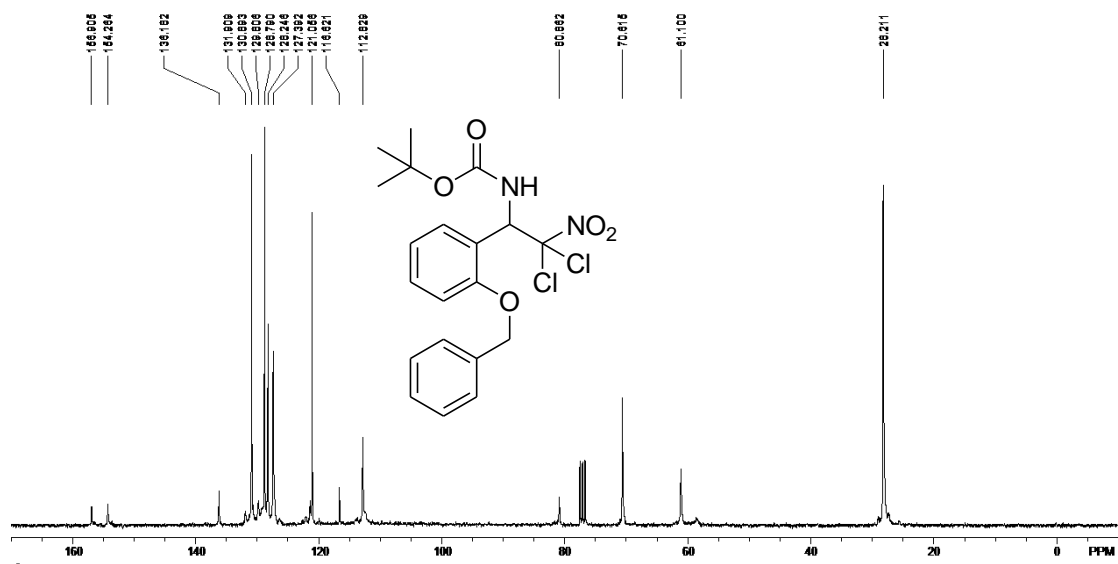

$^1\text{H}$  NMR of **3e** ( $\text{CDCl}_3$ , 300 MHz)

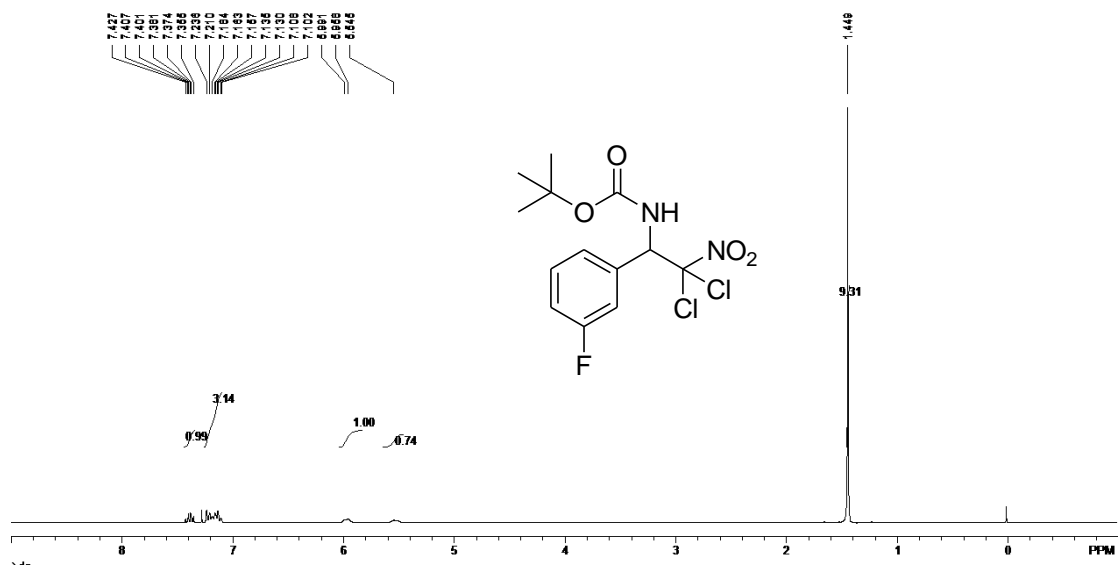

$^{13}\text{C}$  NMR of **3e** ( $\text{CDCl}_3$ , 75 MHz)

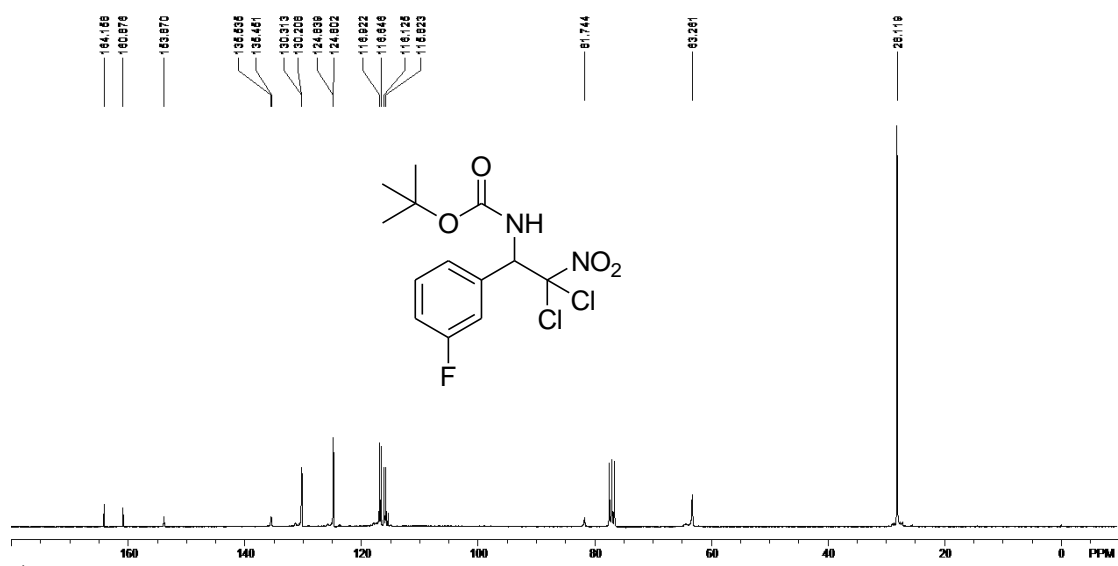

$^1\text{H}$  NMR of **3f** ( $\text{CDCl}_3$ , 300 MHz)

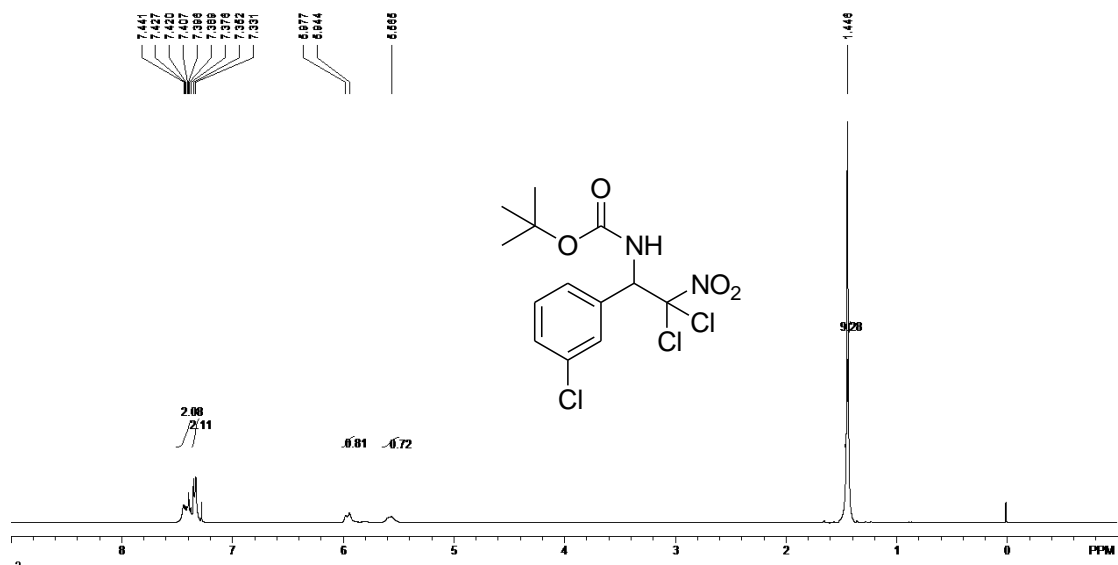

$^{13}\text{C}$  NMR of **3f** ( $\text{CDCl}_3$ , 75 MHz)

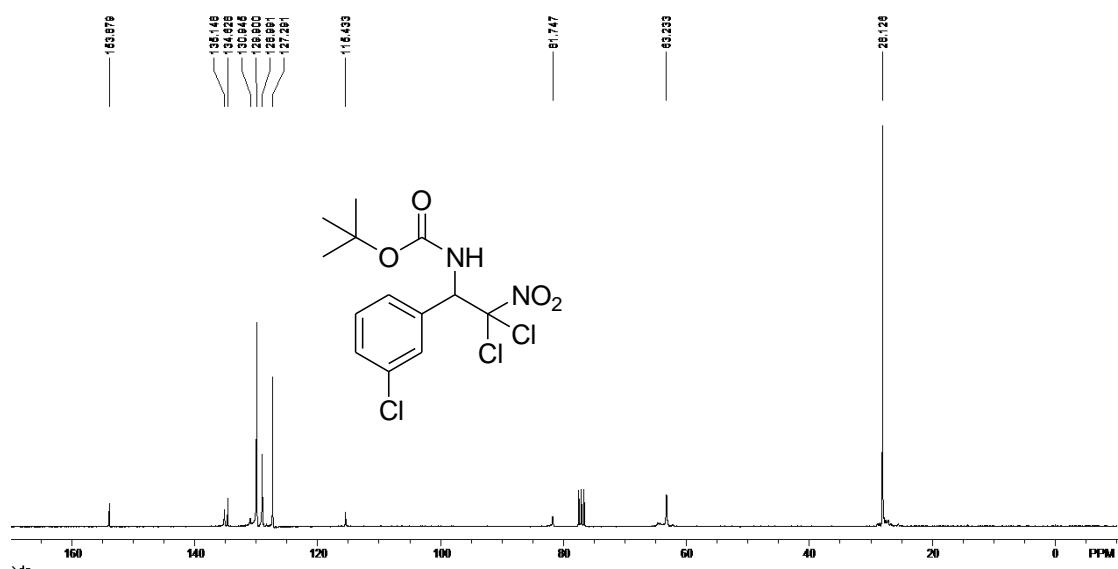



$^1\text{H}$  NMR of **3g** ( $\text{CDCl}_3$ , 300 MHz)

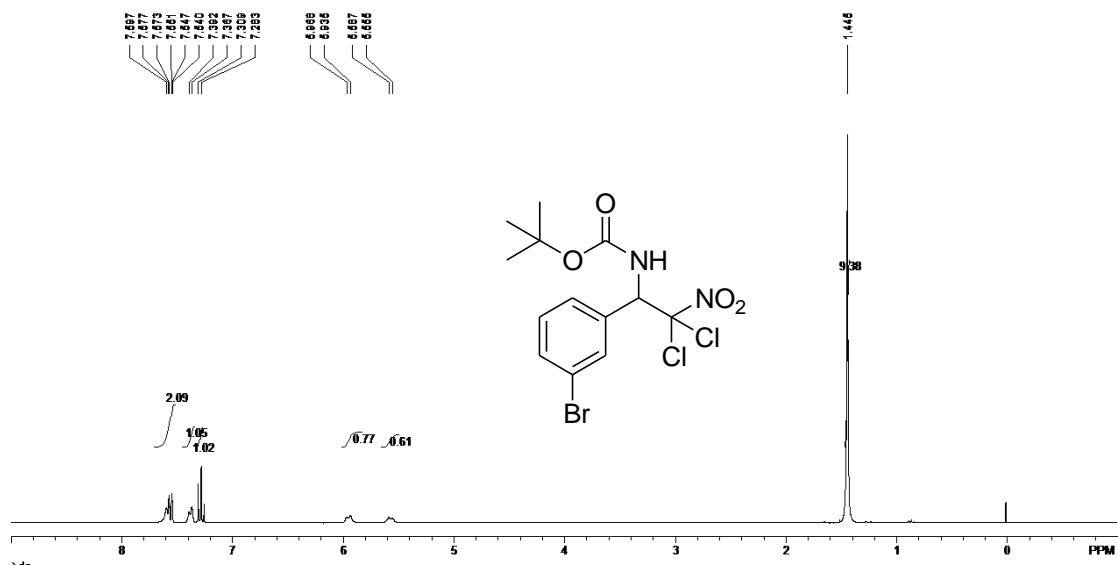

$^{13}\text{C}$  NMR of **3g** ( $\text{CDCl}_3$ , 75 MHz)

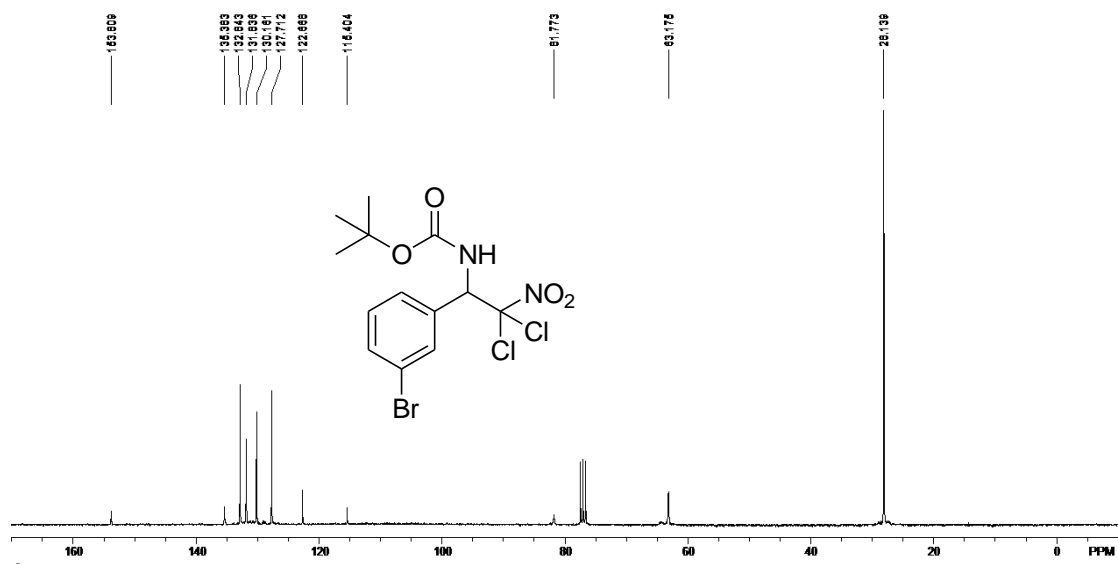

$^1\text{H}$  NMR of **3h** ( $\text{CDCl}_3$ , 300 MHz)

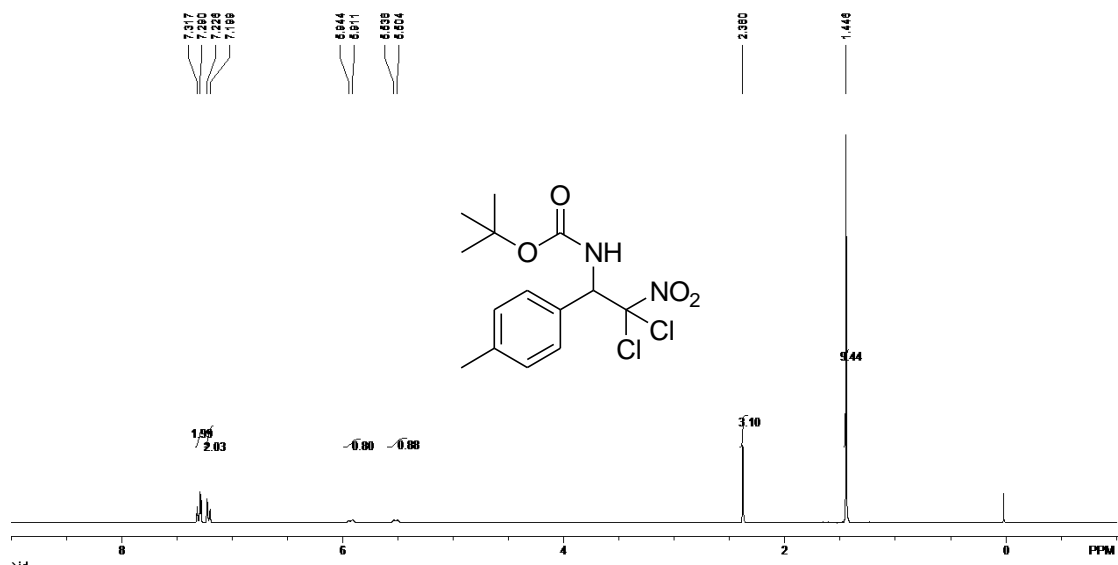

$^{13}\text{C}$  NMR of **3h** ( $\text{CDCl}_3$ , 75 MHz)

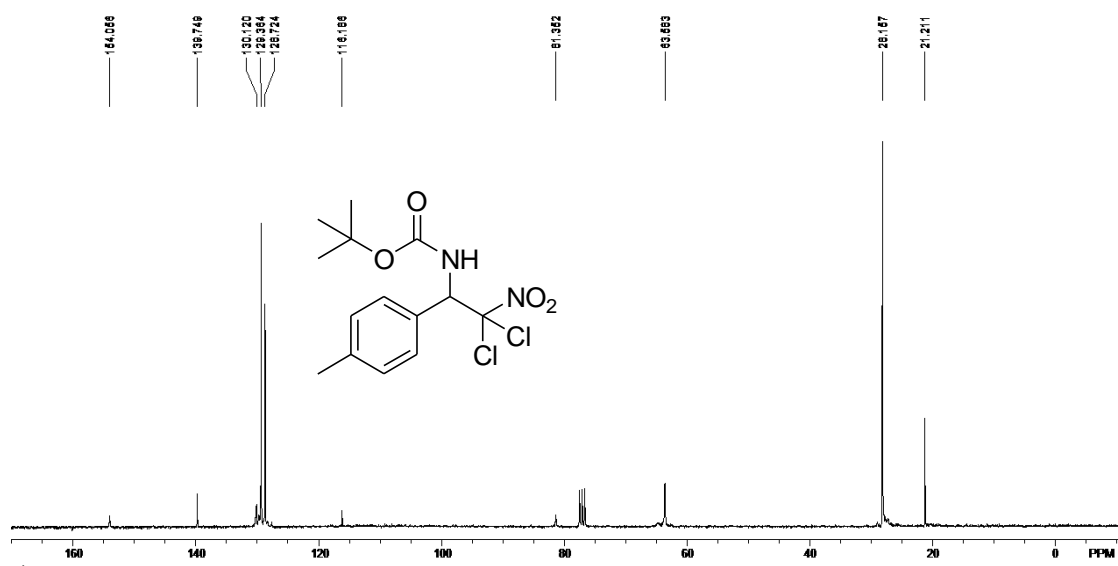

$^1\text{H}$  NMR of **3i** ( $\text{CDCl}_3$ , 300 MHz)

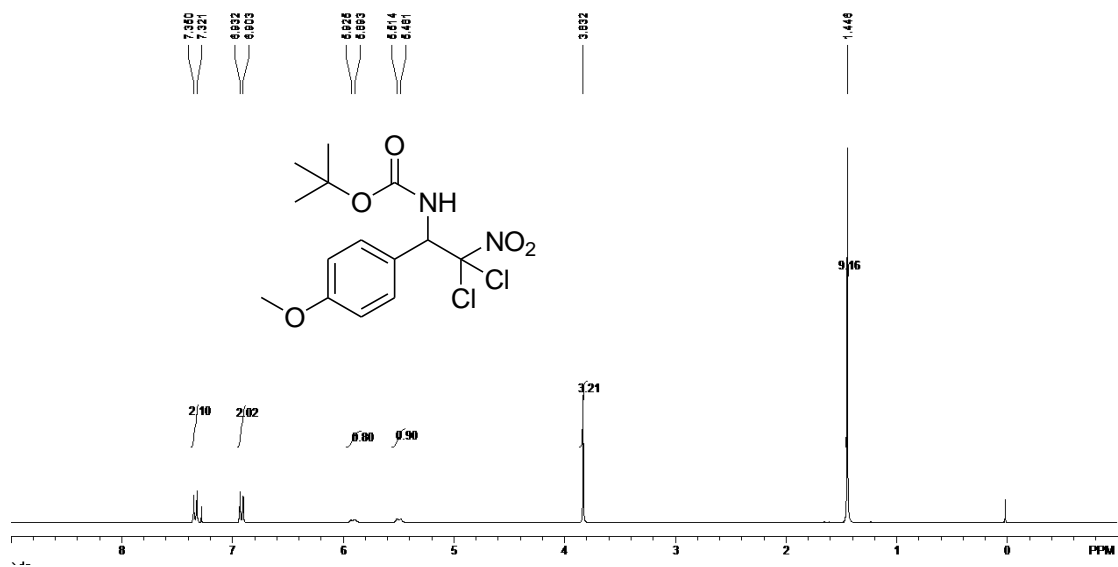

$^{13}\text{C}$  NMR of **3i** ( $\text{CDCl}_3$ , 75 MHz)

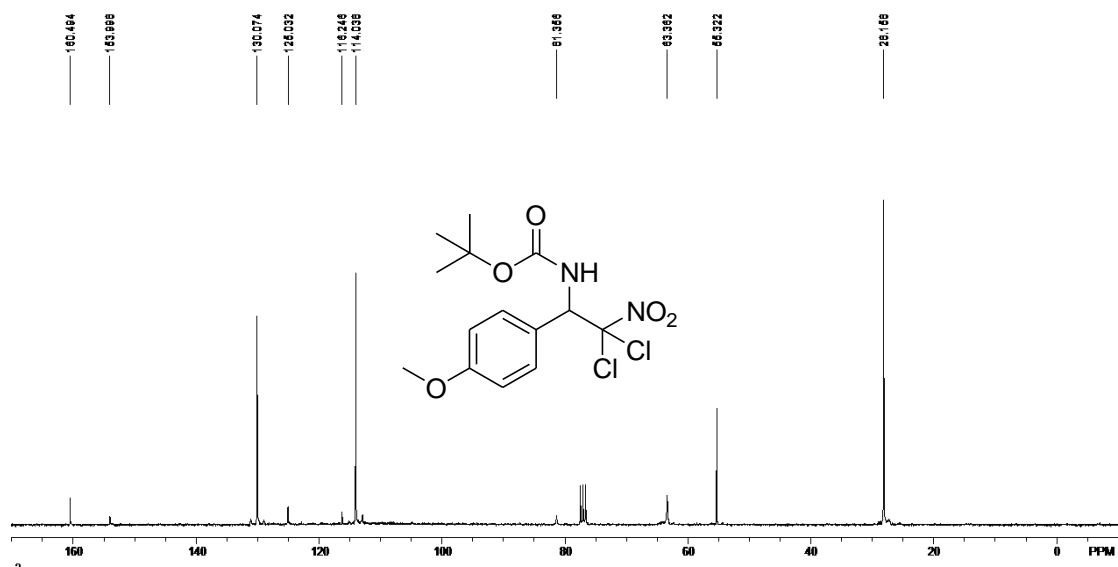

$^1\text{H}$  NMR of **3j** ( $\text{CDCl}_3$ , 300 MHz)

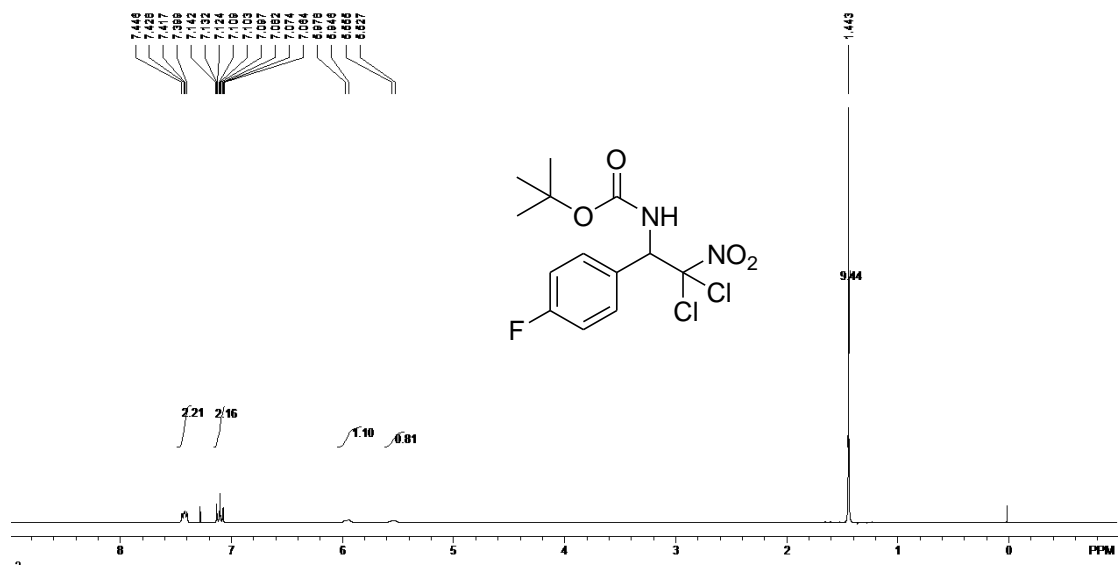

$^{13}\text{C}$  NMR of **3j** ( $\text{CDCl}_3$ , 75 MHz)

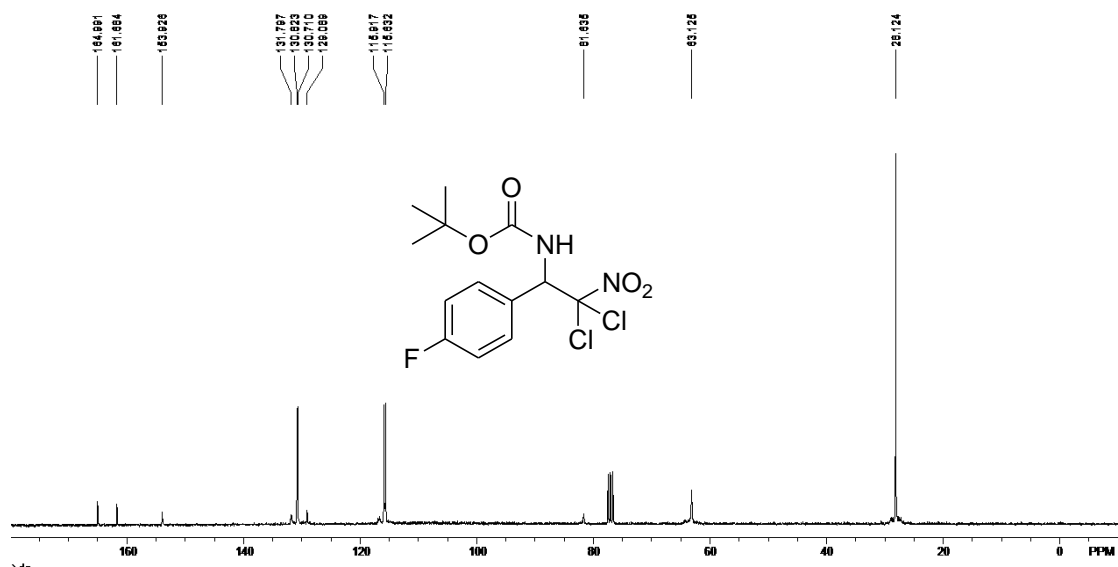

$^1\text{H}$  NMR of **3k** ( $\text{CDCl}_3$ , 300 MHz)

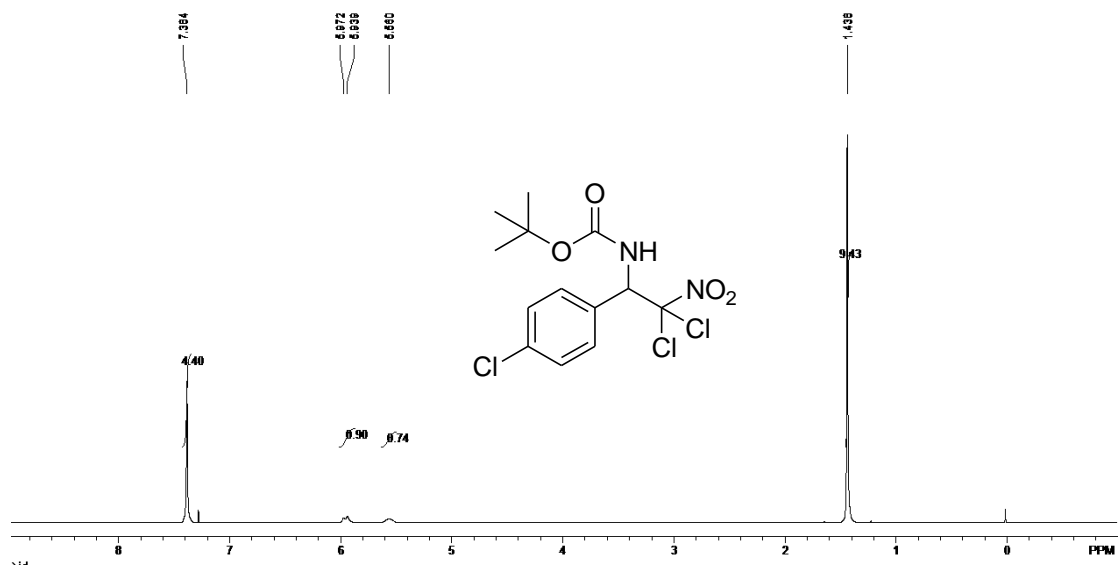

$^{13}\text{C}$  NMR of **3k** ( $\text{CDCl}_3$ , 75 MHz)

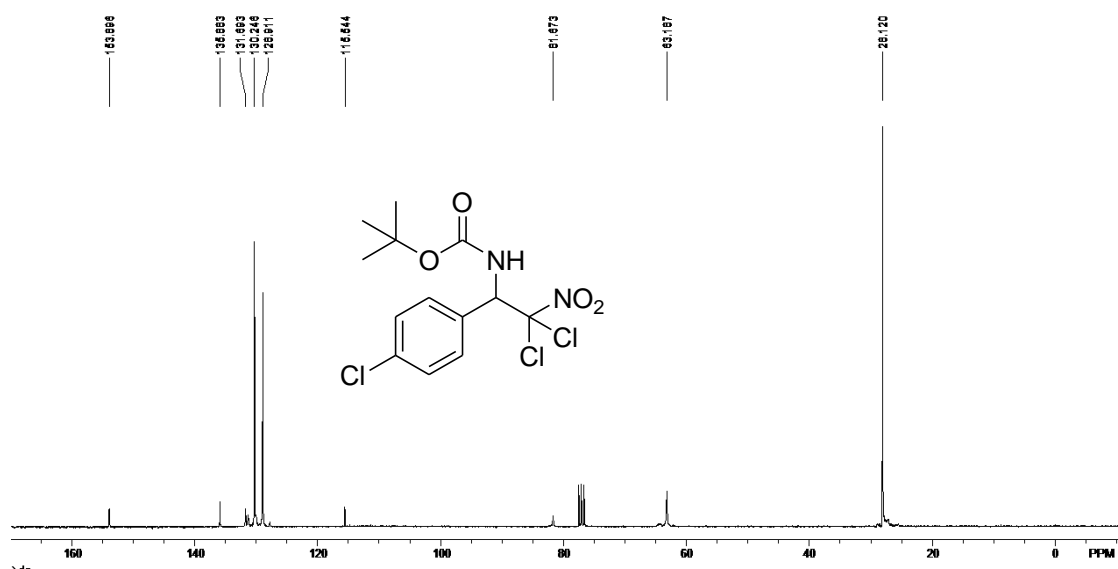

$^1\text{H}$  NMR of **31** ( $\text{CDCl}_3$ , 300 MHz)

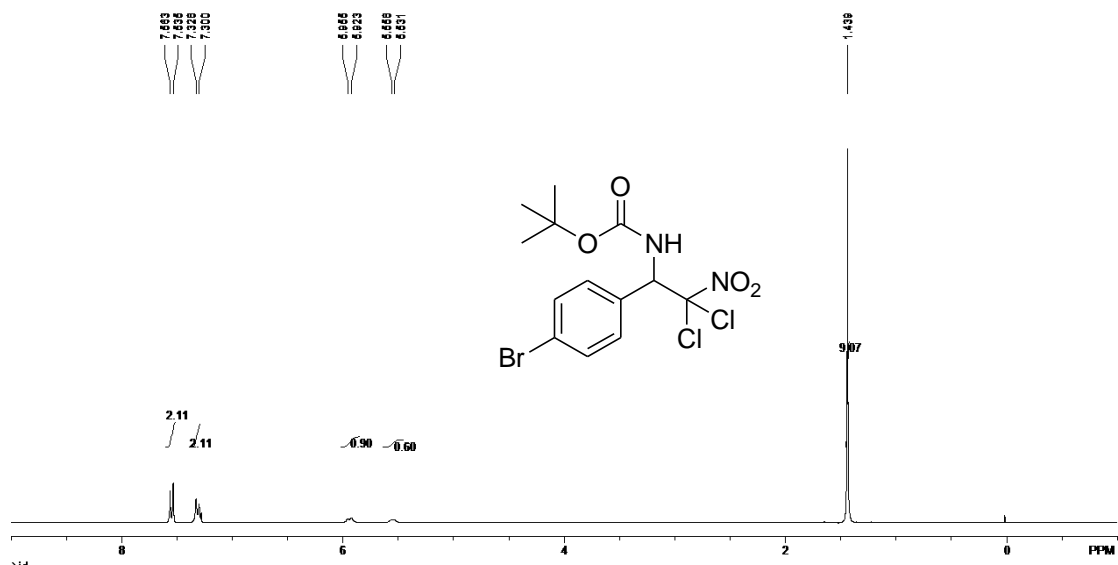

$^{13}\text{C}$  NMR of **31** ( $\text{CDCl}_3$ , 75 MHz)

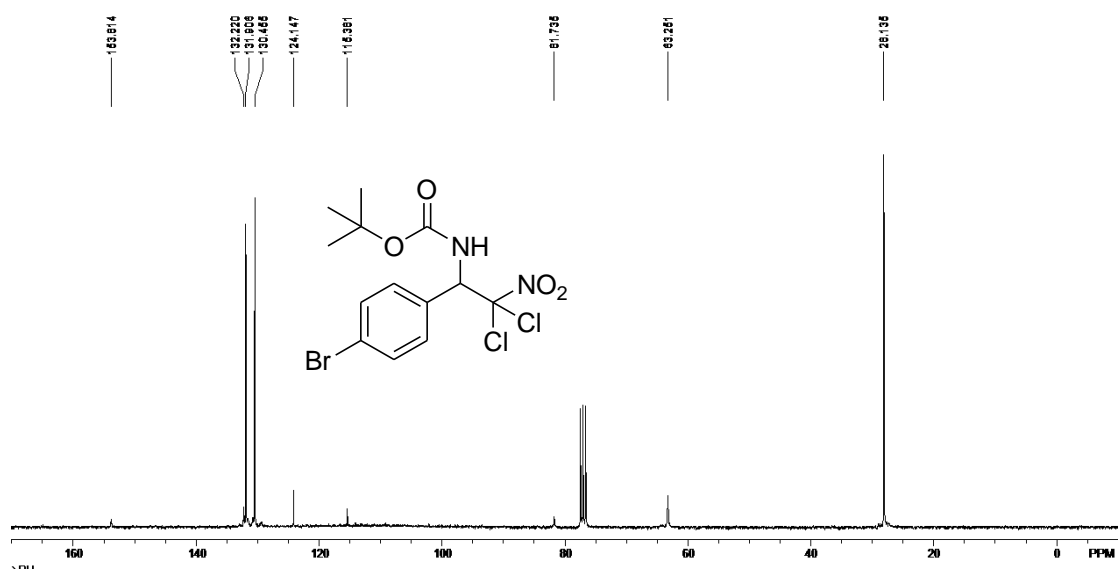

$^1\text{H}$  NMR of **3m** ( $\text{CDCl}_3$ , 300 MHz)

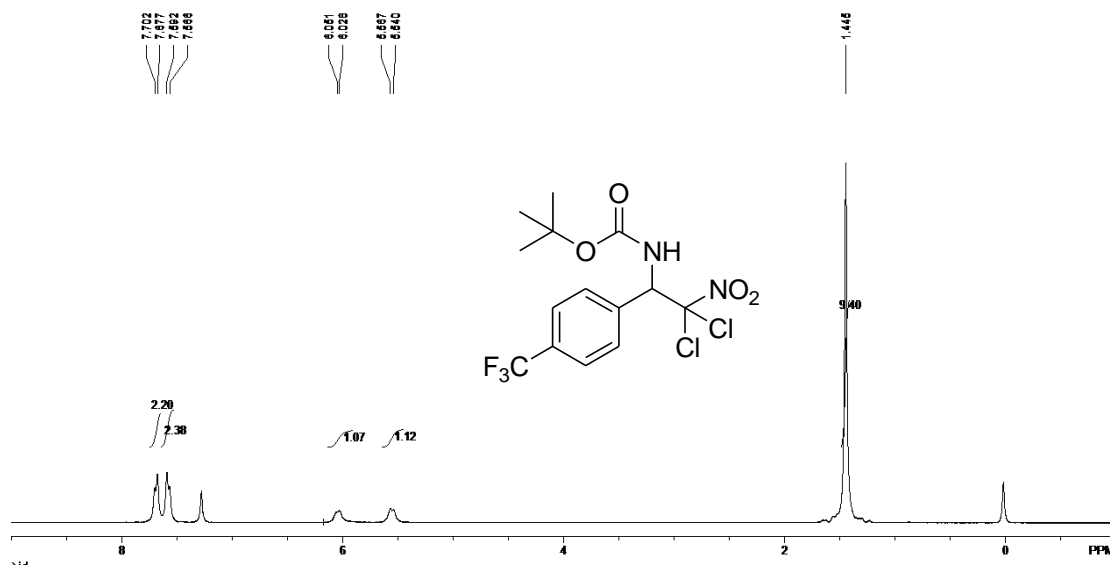

$^{13}\text{C}$  NMR of **3m** ( $\text{CDCl}_3$ , 75 MHz)

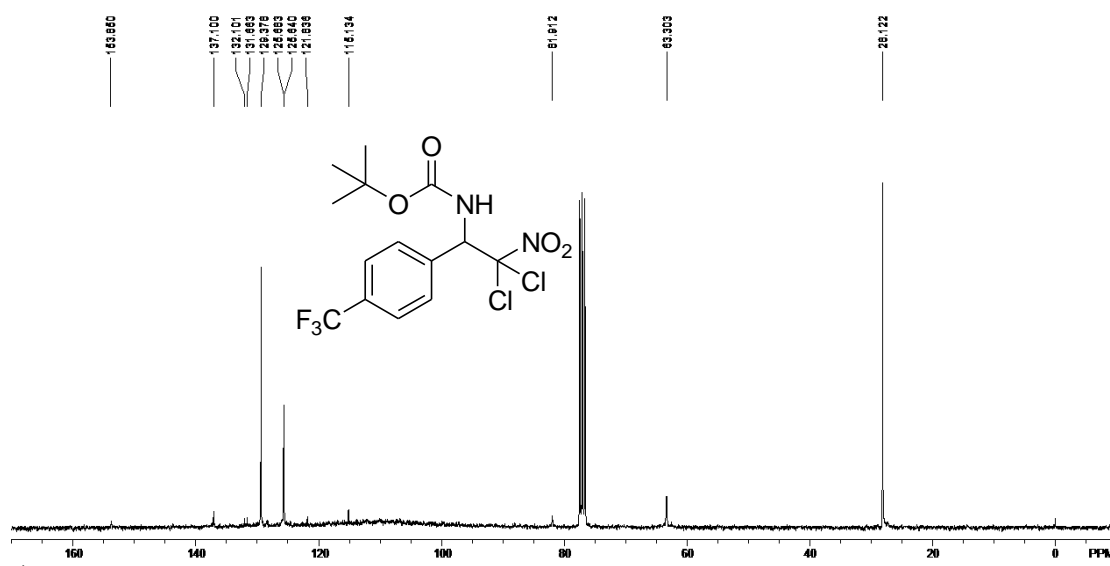

$^1\text{H}$  NMR of **3n** ( $\text{CDCl}_3$ , 300 MHz)

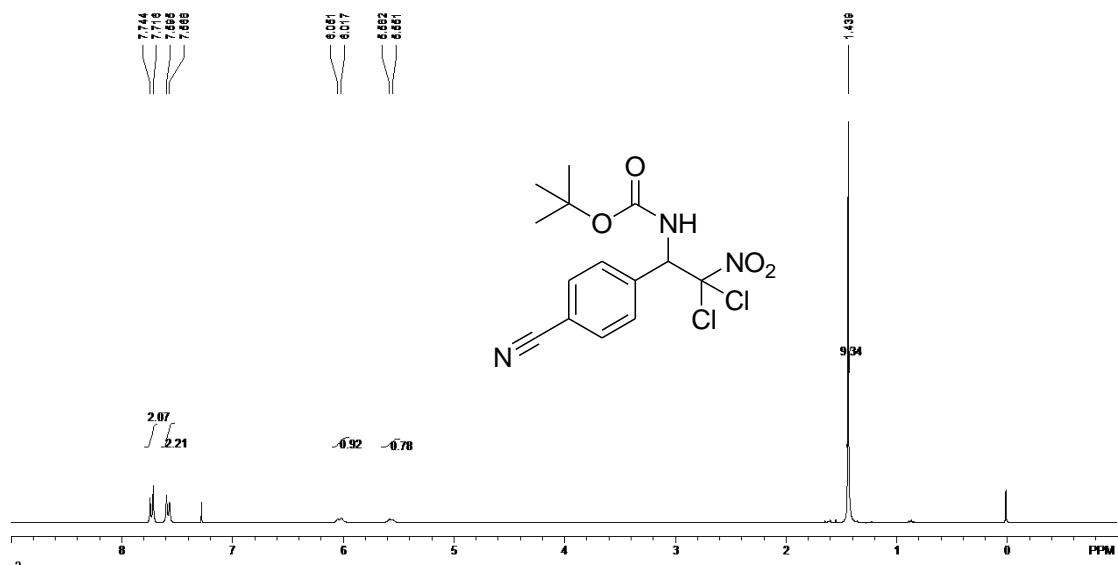

$^{13}\text{C}$  NMR of **3n** ( $\text{CDCl}_3$ , 75 MHz)

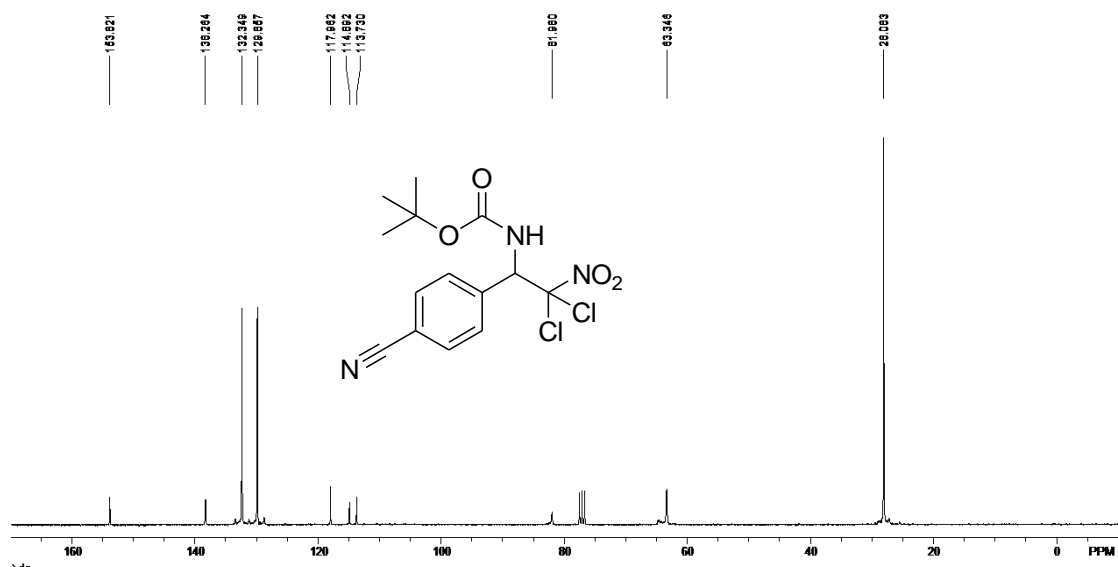



$^1\text{H}$  NMR of **3o** ( $\text{CDCl}_3$ , 300 MHz)

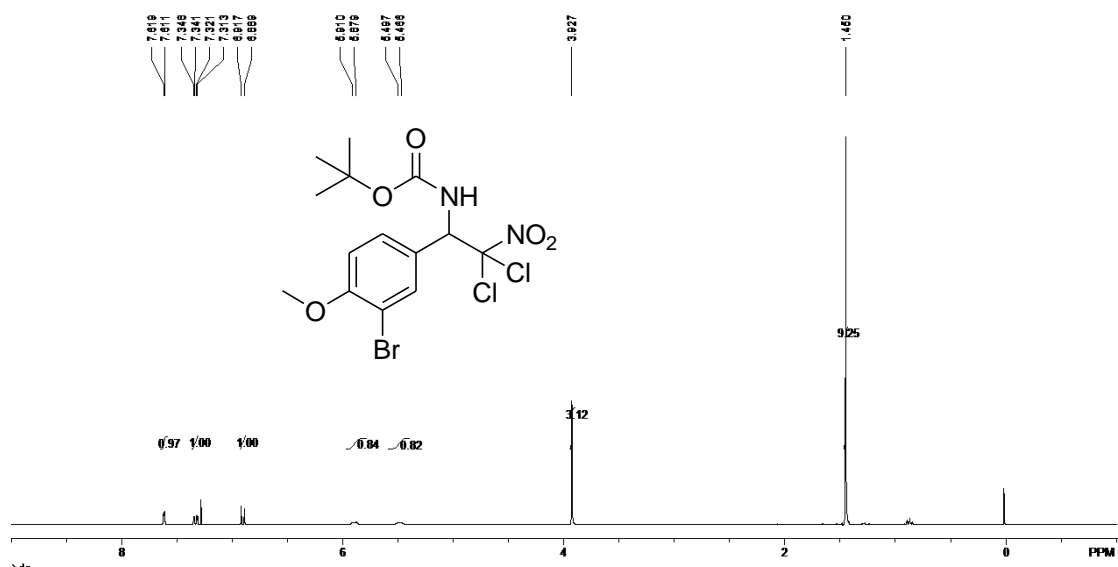

$^{13}\text{C}$  NMR of **3o** ( $\text{CDCl}_3$ , 75 MHz)

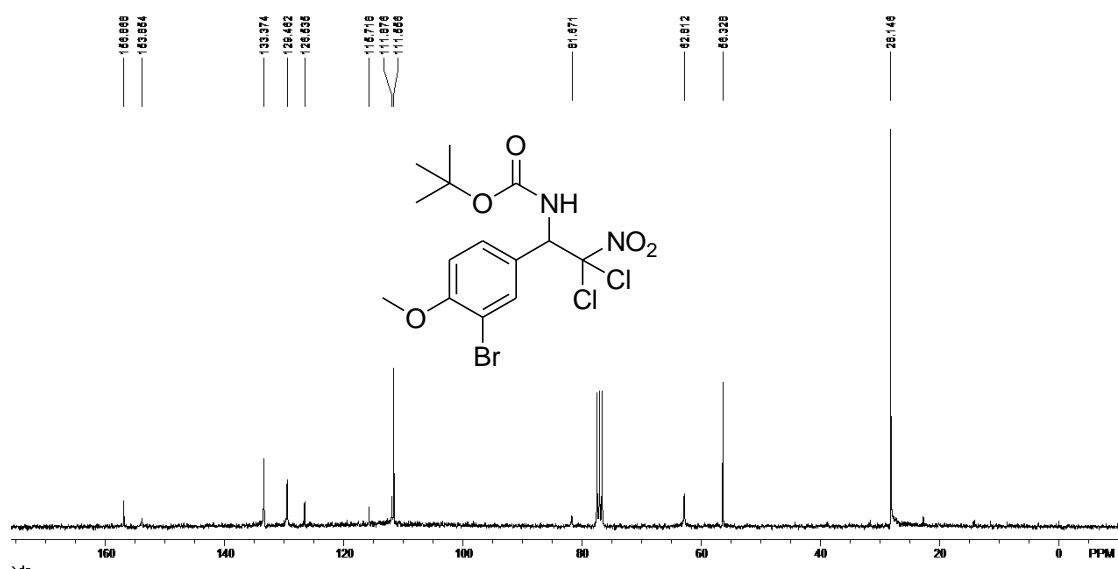

$^1\text{H}$  NMR of **3p** ( $\text{CDCl}_3$ , 300 MHz)

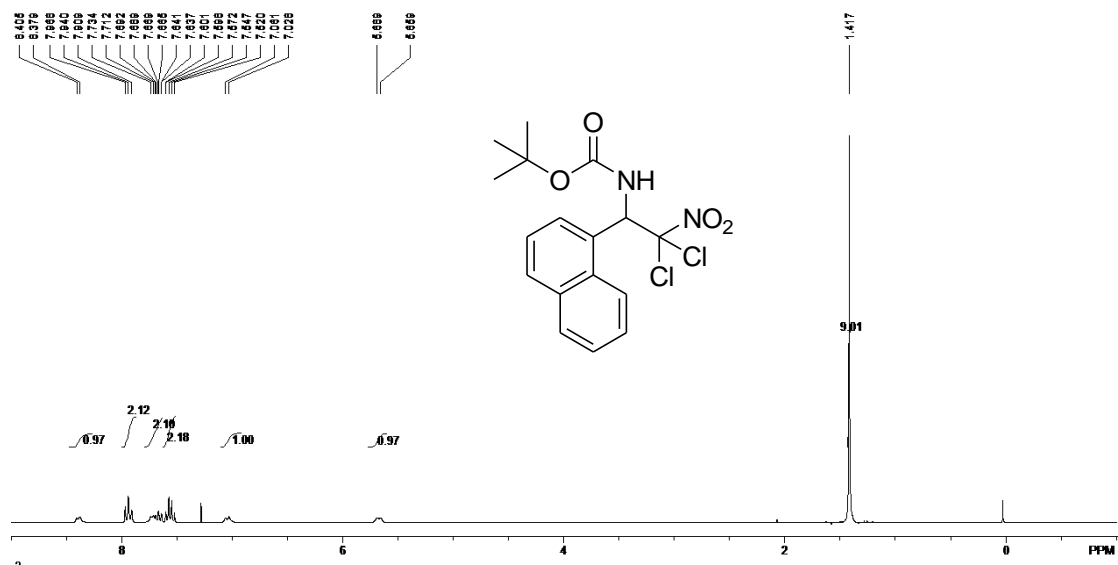

$^{13}\text{C}$  NMR of **3p** ( $\text{CDCl}_3$ , 75 MHz)

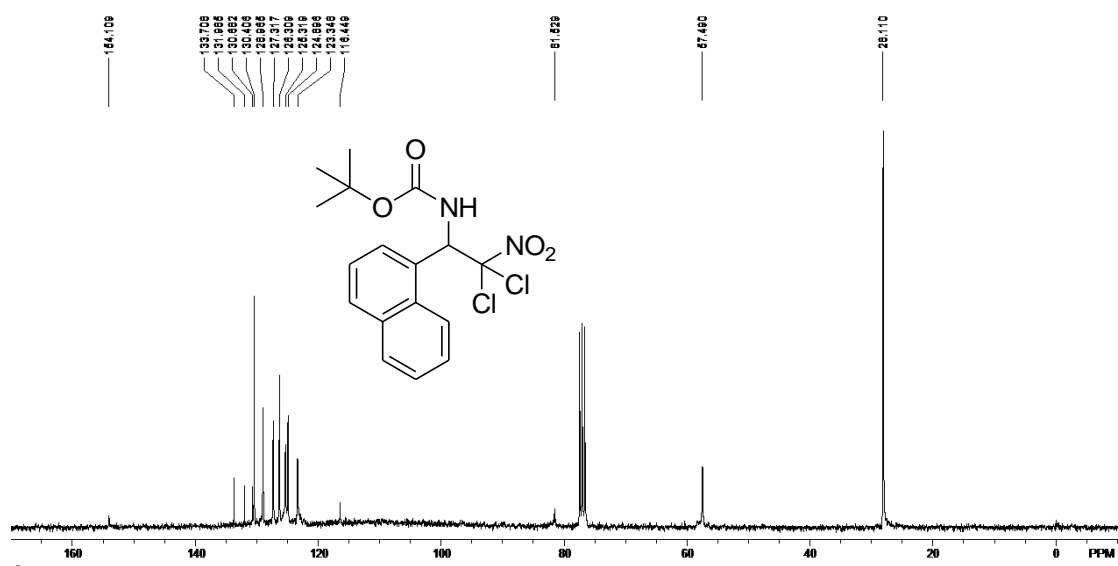

Supplement: c1ra00174d.pdf [file c1ra00174d.pdf]
